# Supplementary material for: DYRK1A Overexpression in Mice Downregulates the Gonadotropic Axis and Disturbs Early Stages of Spermatogenesis
Source: MDPI journal article supplement (doi:10.3390/genes12111800), 2021-11-16

## Supplementary Materials

**Table S1:** Multiple-reaction monitoring transitions, declustering potentials (DP), collision energies (CE), collision cell exit potentials (CXP), quantifiers (Q), and qualifiers (q), for the 16 steroids and stable isotope internal standards.

| Compounds                 | Q1 mass<br>(m/z) | Q3 mass<br>(m/z) | DP<br>(V) | CE<br>(eV) | CXP<br>(V) |
|---------------------------|------------------|------------------|-----------|------------|------------|
| Aldosterone Q             | 359.2            | 189.1            | -130      | -24        | -14        |
| Aldosterone q             | 359.2            | 331.2            | -130      | -23        | -22        |
| Aldosterone-d7            | 366.2            | 338.2            | -130      | -24        | -22        |
| Corticosterone Q          | 347.3            | 119.1            | 130       | 40         | 14         |
| Corticosterone q          | 347.3            | 121.11           | 130       | 35         | 14         |
| Corticosterone-d8         | 355.3            | 125.11           | 130       | 35         | 14         |
| Delta4-Androstenedione Q  | 287.2            | 97.1             | 130       | 40         | 14         |
| Delta4-Androstenedione q  | 287.2            | 109.1            | 130       | 40         | 14         |
| Delta4-Androstenedione-d7 | 294.2            | 113.1            | 130       | 40         | 14         |
| 11-Deoxycorticosterone Q  | 331.3            | 109.1            | 130       | 33         | 14         |
| 11-Deoxycorticosterone q  | 331.3            | 97.1             | 130       | 33         | 14         |
| 11-Deoxycorticosterone-d8 | 339.3            | 113.1            | 130       | 33         | 14         |
| Testosterone Q            | 289.2            | 109.1            | 130       | 31         | 14         |
| Testosterone q            | 289.2            | 97.1             | 130       | 31         | 14         |
| Testosterone-d5           | 294.3            | 113.1            | 130       | 33         | 14         |
| Progesterone Q            | 315.3            | 109.1            | 130       | 35         | 14         |
| Progesterone q            | 315.3            | 97.1             | 130       | 35         | 14         |
| Progesterone D9           | 324.3            | 100.1            | 130       | 35         | 14         |

**Table S2:** Primers used for real time quantitative RT-PCR of specific mRNAs.

| Gene          | Forward primer         | Reverse primer         |
|---------------|------------------------|------------------------|
| DYRK1A        | tcagtcttcaggcaccacct   | tgttactcgttcccgaggat   |
| Plzf          | gacgcactacaggggtcacac  | gcttgatcatggccgagtag   |
| Gfra1         | ctcgagaaaagacacacacacc | gcctgaccatgtaaagcagtc  |
| Sycp3         | ggacagcgacagctcacc     | aagggtggcttcccagatttc  |
| Kit-L         | cagcgctgccttccttat     | ccttggttttgacaagaggatt |
| Protamine     | gacagcccacaaaattccac   | ctcagagcaggggacacc     |
| P450scc       | ggcgtgtagtgtcttagtgtcg | gggggtccacgatgtaaactg  |
| StAR          | aaactcacttggtgctcagta  | tgcgataggacctgggtgat   |
| P450c17       | catcccacacaaggctaaca   | cagtgccagagattgatgat   |
| 3 $\beta$ HSD | gaccagaaaccaaggaggaa   | gcactgggcatccagaat     |
| TAC3          | ctccttccttcagtctctctc  | ccttttcccctcaaagctc    |
| rpL19         | gggcaggcatatgggcata    | ggcgggtcaatcttcttgatt  |
| TBP           | ggggagctgtgatgtgaagt   | ccaggaaataattctggctca  |

**Figure S1** : Slot-blot of Dyrk1a WT and Tg mice in testis: a : Ponceau highlighting similar total protein levels; b: Dyrk1a slot-blot.

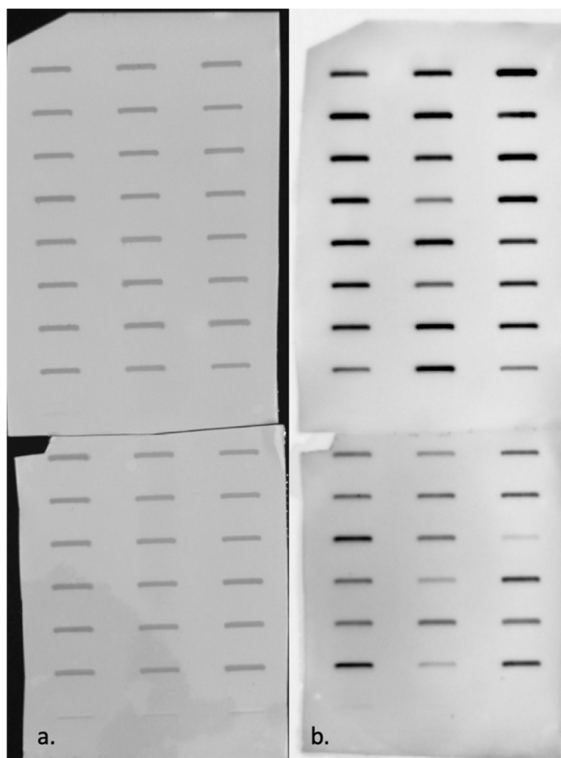

**Figure S2** : Plzf western blot in WT and Tg mice performed to assess the specificity of specific antibody. Specific anti-Plzf is found between 46 and 58 kDa.

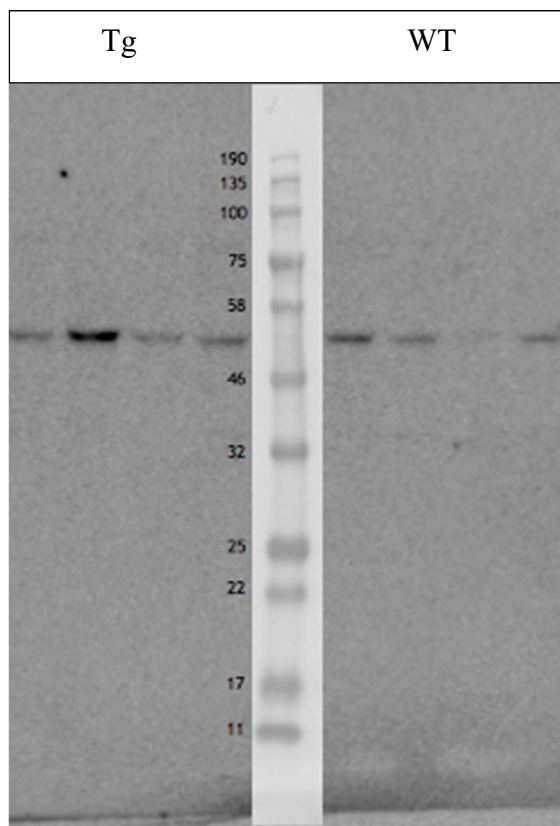

Supplement: s1 [file s1]
